# Supplementary material
Source: PubMed Central journal article supplement (PMC5765536)
Supplement: np7b00284_si_001.pdf [file np7b00284_si_001.pdf]

## **DESIGNER Extracts as Tools to Balance Estrogenic and Chemopreventive Activities of Botanicals for Women's Health**

Birgit M. Dietz,<sup>†</sup> Shao-Nong Chen,<sup>†,‡</sup> René F. Ramos Alvarenga,<sup>†,§</sup> Huali Dong,<sup>†</sup> Dejan Nikolić,<sup>†</sup> Martin Biendl,<sup>‡</sup> Richard B. van Breemen,<sup>†</sup> Judy L. Bolton,<sup>\*,†</sup> and Guido F. Pauli<sup>\*,†,‡</sup>

<sup>†</sup>UIC/NIH Center for Botanical Dietary Supplements Research and <sup>‡</sup>Center for Natural Product Technologies, Department of Medicinal Chemistry and Pharmacognosy, College of Pharmacy, University of Illinois at Chicago, 833 S. Wood St., M/C 781, Chicago, Illinois 60612, United States

<sup>§</sup>Current Affiliation: School of Pharmacy, University of Wisconsin-Madison, 777 Highland Ave., Madison, Wisconsin 53705, United States

<sup>‡</sup>Hopsteiner, Hallertauer Hopfenveredelung GmbH, Auhofstrasse 16, 84048 Mainburg, Germany

## **■ Supporting Information**

## ■ Table of Contents

|                                                                                                                                    |          |
|------------------------------------------------------------------------------------------------------------------------------------|----------|
| <b>S1. The Estrogenic Activity of the DESIGNER Hop Extracts Correlates with the 8-Prenylnaringenin (8-PN) Concentration. ....</b>  | <b>3</b> |
| <b>S2. The Cytotoxicity of the Hop DESIGNER Extracts Correlates with the Xanthohumol (XH) Concentration. ....</b>                  | <b>4</b> |
| <b>S3. Cytotoxicity of the Hop DESIGNER Extracts is Mainly, But Not Only Dependent on the Xanthohumol (XH) Concentration. ....</b> | <b>5</b> |
| <b>S4. Xanthohumol (XH) Depicts Anti-estrogenic Activities Before It Shows Cytotoxicity. ....</b>                                  | <b>6</b> |
| <b>S5. Names and Codes of DESIGNER Extracts with Their Deposited Specimen Codes. ....</b>                                          | <b>7</b> |

**S1. The Estrogenic Activity of the DESIGNER Hop Extracts Correlates with the 8-Prenylnaringenin (8-PN) Concentration.**

Linear regression of the EC<sub>50</sub>'s generated in Fig. 2B (Table 2) and the corresponding log 8-PN% concentration (Table 1) performed with GraphPad Prism 6 ( $r^2 = 0.91$ ). According to the Pearson correlation, the EC<sub>50</sub>'s of the DESIGNER hop extracts significantly correlate ( $r = -0.95$ ,  $p < 0.0034$ ) with the log 8-PN% concentration. Ex5 and Ex7 were not active in the AP assay (Table 2); therefore, an EC<sub>50</sub> could not be determined.

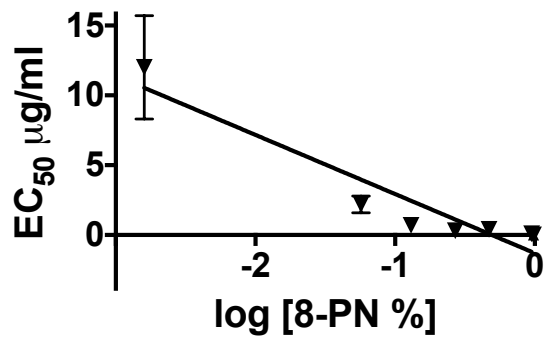

**S2. The Cytotoxicity of the Hop DESIGNER Extracts Correlates with the Xanthohumol (XH) Concentration.**

Linear regression of the  $IC_{50}$ 's generated in Fig. 4B (Table 2) and the corresponding log XH% concentration performed with GraphPad Prism 6 ( $r^2 = 0.78$ ). According to the Pearson correlation, the  $IC_{50}$ 's of the DESIGNER hop extracts significantly correlate ( $r = -0.88$ ,  $p < 0.021$ ) with the log XH% concentration. Ex6 and Ex8 were not active in this assay; therefore an  $IC_{50}$  could not be determined.

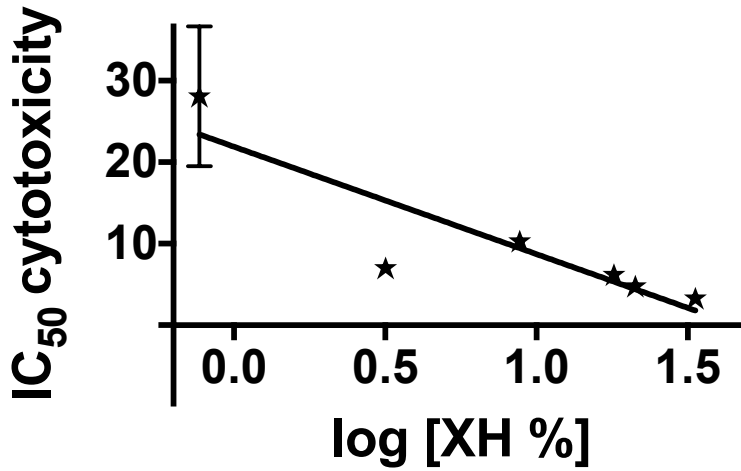

**S3.** Cytotoxicity of the Hop DESIGNER Extracts is Mainly, But Not Only Dependent on the Xanthohumol (XH) Concentration.

In IX rich extracts IX can significantly contribute to hops cytotoxicity. Cytotoxicity was performed in parallel to the AP assay with the SRB assay in Ishikawa cells. Cytotoxicity of the DESIGNER hop extracts, (A) the IX rich extract, Ex1 (7.2  $\mu\text{g}/\text{mL}$ ), and the equivalent concentrations of XH (0.64  $\mu\text{M}$ ), IX (12.7  $\mu\text{M}$ ), and their combinations and (B) Ex4 (10.3  $\mu\text{g}/\text{mL}$ ) and the equivalent concentrations of XH (2.6  $\mu\text{M}$ ), IX (0.31  $\mu\text{M}$ ) and their combinations. Dose-response curves were generated by non-linear regression analysis using GraphPad Prism 6.

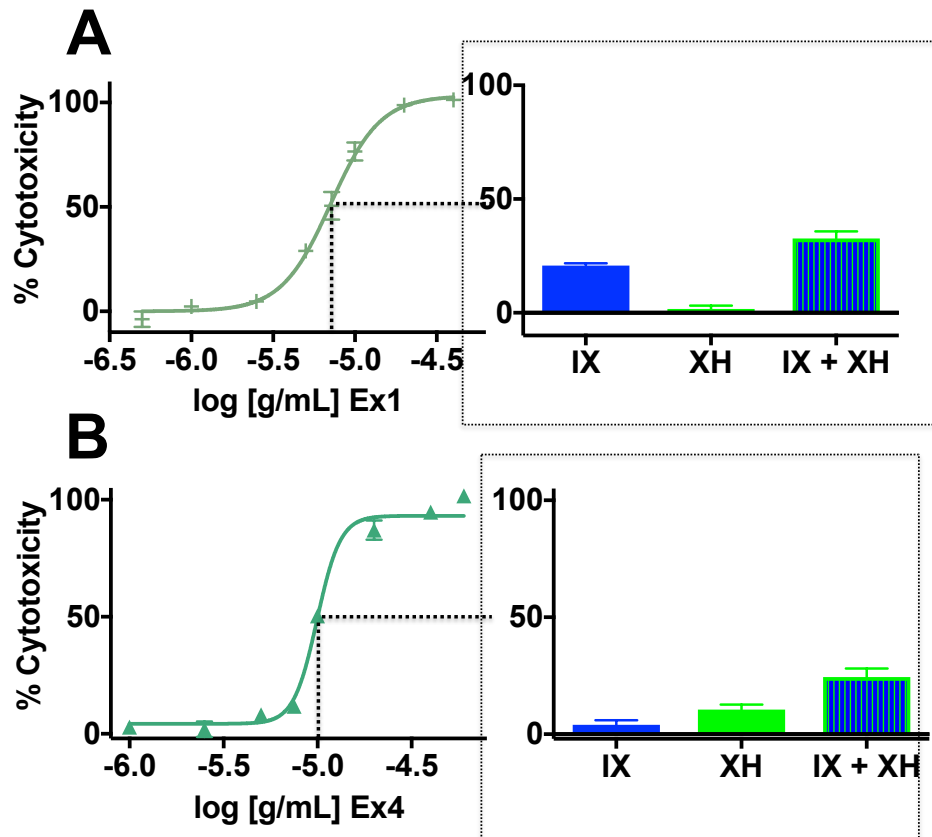

#### S4. Xanthohumol (XH) Depicts Anti-estrogenic Activities Before It Shows Cytotoxicity.

Inhibition of estradiol-induced activity of alkaline phosphatase in Ishikawa cells by XH. In parallel, cytotoxicity was determined with the SRB assay. Results are the means  $\pm$  SEM of at least three independent determinations in triplicate. Dose-response curves were generated by non-linear regression analysis using GraphPad Prism 6.

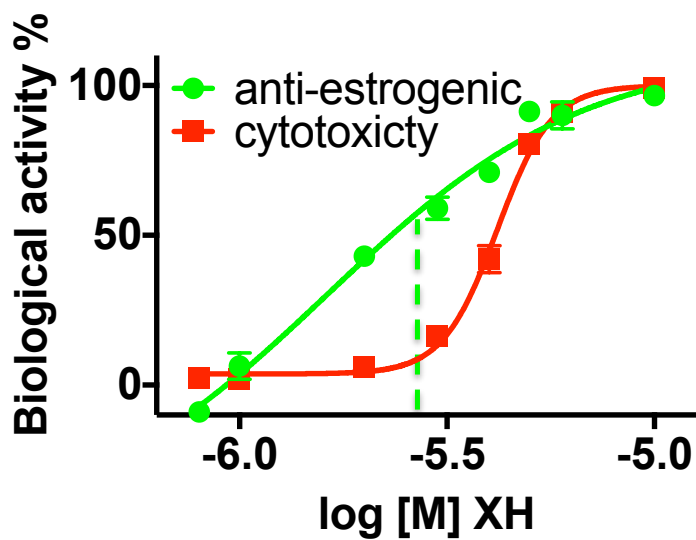

S5. Names and Codes of DESIGNER Extracts with Their Deposited Specimen Codes.

| DESIGNER extract names                | code based on [8-PN] | code for deposited specimens |
|---------------------------------------|----------------------|------------------------------|
| <i>specialized extracts</i>           |                      |                              |
| Isoxanthoflav                         | Ex1                  | BC691                        |
| Isoxantho                             | Ex2                  | BC690                        |
| Clinical                              | Ex3                  | BC402                        |
| Xantho                                | Ex4                  | BC692                        |
| <i>“Knock-out (KO)”-type extracts</i> |                      |                              |
| IX-KOE                                | Ex5                  |                              |
| Multi-KOE                             | Ex6                  |                              |
| 8-PN/6-PN-KOE                         | Ex7                  |                              |
| XH-KOE                                | Ex8                  |                              |
